# Supplementary material
Source: PubMed Central journal article supplement (PMC1595425)

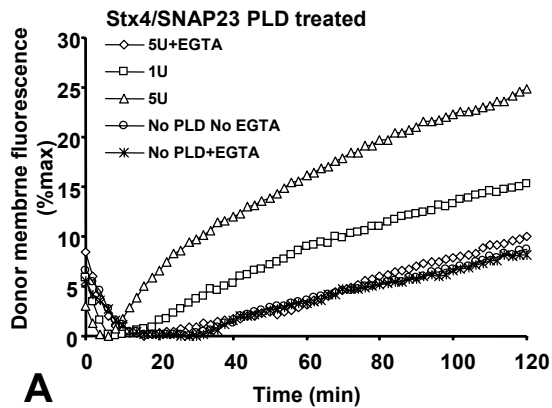

**A**

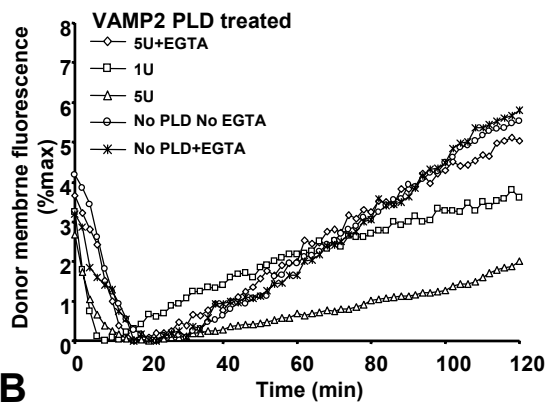

**B**

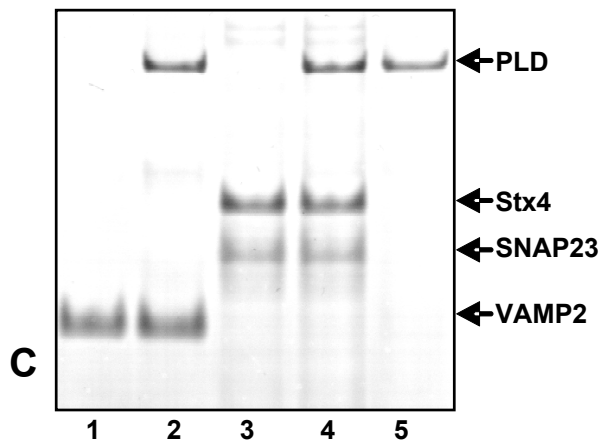

Supplement: pnas_0606881103_1.pdf [file pnas_0606881103_1.pdf]

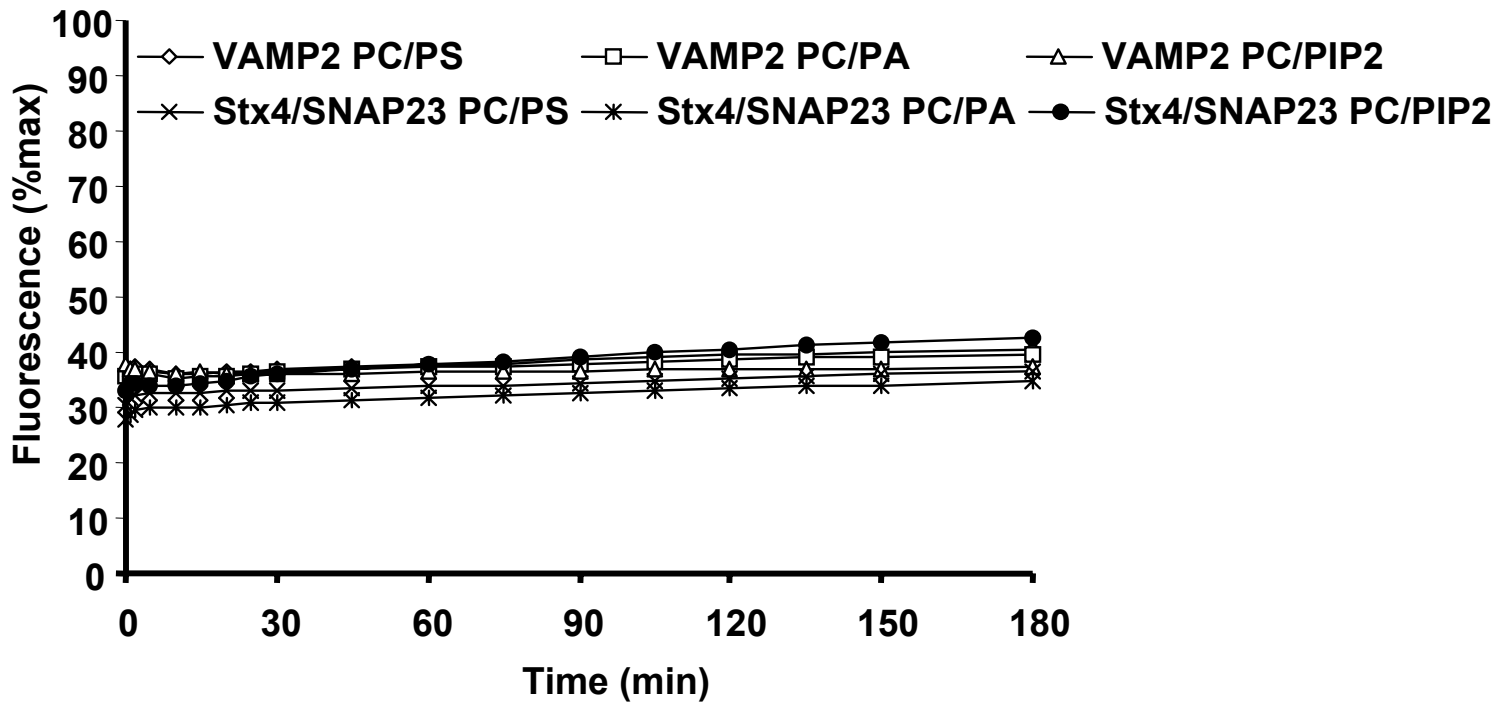

Supplement: pnas_0606881103_2.pdf [file pnas_0606881103_2.pdf]

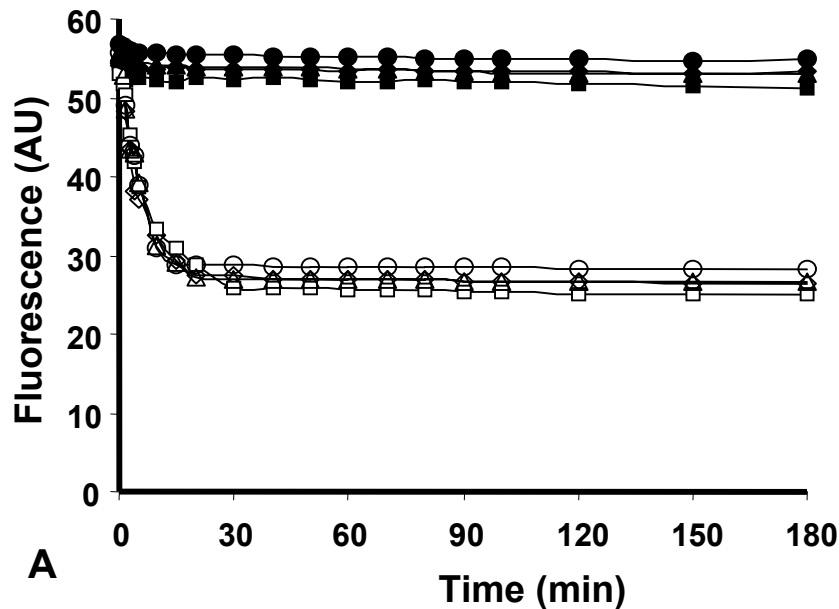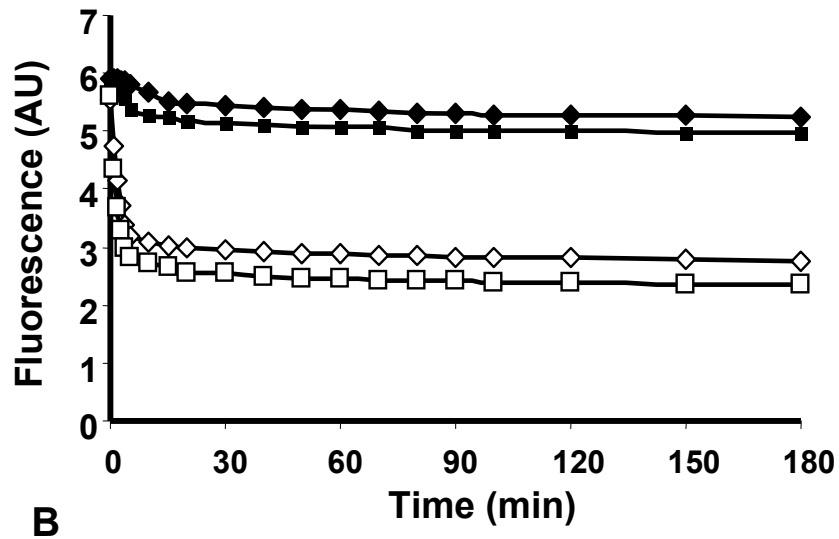

Supplement: pnas_0606881103_3.pdf [file pnas_0606881103_3.pdf]

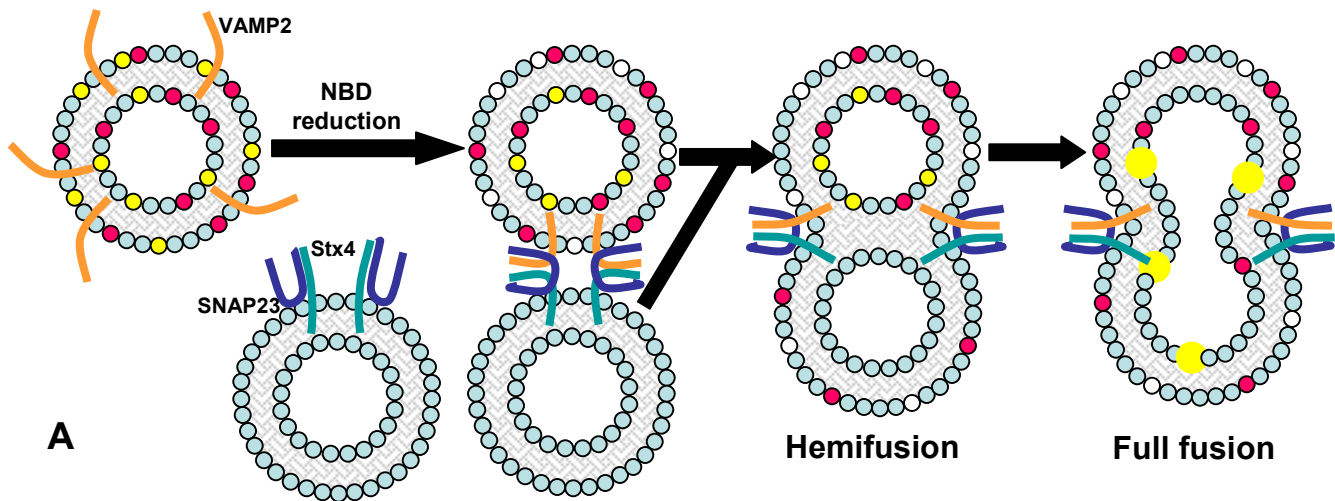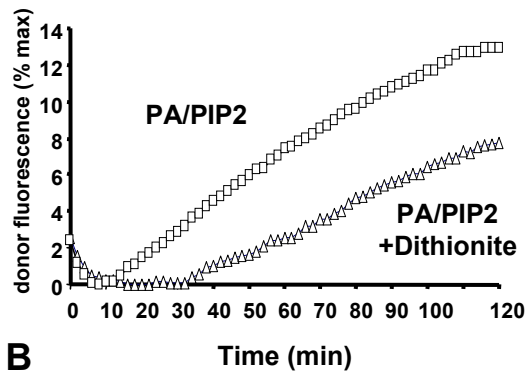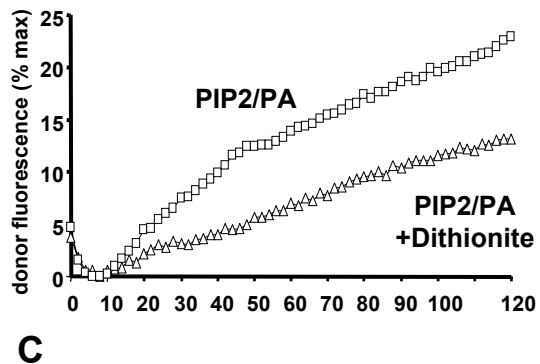

Supplement: pnas_0606881103_4.pdf [file pnas_0606881103_4.pdf]
